# Supplementary material for: Prognostic Accuracy of qSOFA and SIRS for Mortality in the Emergency Department: A Meta-Analysis and Systematic Review of Prospective Studies
Source: Emerg Med Int. 2022 May 5;2022:1802707. doi: 10.1155/2022/1802707 (PMC9098353; doi:10.1155/2022/1802707)
Supplement: Supplementary Materials — (1) The .xlsx file “original database” contains all the raw data extracted from the included articles which are used for generating the results of this study. (2) The file folder “sensitivity analysis-forest plots” contains all the forest plots in the section of sensitivity analysis. The file with the name of author indicates the study that was omitted in each sensitivity analysis. (3) The file folder “subgroup analysis-forest plots” contains all the forest plots in the section of subgroup analysis. Each forest plot corresponds to the subgroup in Table 2. () [file 1802707.f1.zip › 1802707.f1/original database.xlsx]

## Sheet: Sheet1
PMID	First author	Publication time	Title	Study location	Participant selection	No. of patients	Mean/median age (years)	No. of death	qSOFA TP	qSOFA FN	qSOFA FP	qSOFA TN	SIRS TP	SIRS FN	SIRS FP	SIRS TN
34321893	Abdullah	2021	Prognostic Accuracy of SOFA, qSOFA, and SIRS for Mortality Among Emergency Department Patients with Infections	Denmark	with suspected infection	2045	73.2	158	31	127	143	1744	83	75	915	972
28599661	Askim	2017	Poor performance of quick-SOFA (qSOFA) score in predicting severe sepsis and mortality - a prospective study of patients admitted with infection to the emergency department	Norway	with suspected infection	1535	62	26	3	23	60	1449	17	9	686	823
34190738	Azijli	2021	A prospective, observational study of the performance of MEWS, NEWS, SIRS and qSOFA for early risk stratification for adverse outcomes in patients with suspected infections at the emergency department	the Netherlands	with suspected infection	1328	62.6	62	11	51	72	1194	46	16	711	555
29902174	Boillat-Blanco	2018	Prognostic value of quickSOFA as a predictor of 28-day mortality among febrile adult patients presenting to emergency departments in Dar es Salaam, Tanzania	Tanzania	with fever	519		32	19	13	58	429	29	3	394	93
28755060	Castillo	2017	Prognostic accuracy of SIRS criteria, qSOFA score and GYM score for 30-day-mortality in older non-severely dependent infected patients attended in the emergency department	Spain	older patients with suspected infection	1071	83.6	72	20	52	63	936	47	25	509	490
28114554	Freund	2017	Prognostic Accuracy of Sepsis-3 Criteria for In-Hospital Mortality Among Patients With Suspected Infection Presenting to the Emergency Department	France	with suspected infection	879	67	74	52	22	169	636	69	5	588	217
31735660	George	2019	External Validation of the qSOFA Score in Emergency Department Patients With Pneumonia	USA	with pneumonia	713	61	36	19	17	135	542	32	4	508	169
32530356	Graham	2020	NEWS and qSIRS superior to qSOFA in the prediction of 30-day mortality in emergency department patients in Hong Kong	China	none	1253	72	71	8	63	11	1171	32	39	262	920
28262318	Henning	2017	An Emergency Department Validation of the SEP-3 Sepsis and Septic Shock Definitions and Comparison With 1992 Consensus Definitions	USA	with suspected infection	7637	56.9	333	173	160	1023	6281	276	57	3652	3652
32036543	Loritz	2020	Prospective evaluation of the quickSOFA score as a screening for sepsis in the emergency department	Germany	patients of any non-traumatic cause	1668	63	52	30	22	112	1504	36	16	419	1197
33839632	Oduncu	2021	Comparison of qSOFA, SIRS, and NEWS scoring systems for diagnosis, mortality, and morbidity of sepsis in emergency department	Turkey	with suspected infection	463	63	84	33	51	33	346	69	15	267	112
28613918	Ranzani	2017	New Sepsis Definition (Sepsis-3) and Community-acquired Pneumonia Mortality. A Validation and Clinical Decision-Making Study	Spain	with a clinical diagnosis of CAP	6024	66	442	221	221	1061	4521	393	49	4354	1228
30479248	Schmedding	2019	A Prospective Comparison of Quick Sequential Organ Failure Assessment, Systemic Inflammatory Response Syndrome Criteria, Universal Vital Assessment, and Modified Early Warning Score to Predict Mortality in Patients with Suspected Infection in Gabon	Gabon	with an infectious diagnosis	187	38	11	6	5	32	144	9	2	120	56
32317296	Sinto	2020	Prognostic accuracy of the quick Sequential Organ Failure Assessment (qSOFA)-lactate criteria for mortality in adults with suspected bacterial infection in the emergency department of a hospital with limited resources	Indonesia	with suspected infection	1213	51	421	331	90	419	373	390	31	698	94
27876592	Williams	2017	Systemic Inflammatory Response Syndrome, Quick Sequential Organ Function Assessment, and Organ Dysfunction: Insights From a Prospective Database of ED Patients With Infection	Australia	with suspected infection	8871	49	327	164	163	743	7801	253	74	3922	4622
34586431	Yesil	2021	Performance of qSOFA, SIRS, and the qSOFA + SIRS combinations for predicting 30-day adverse outcomes in patients with suspected infection	Turkey	with suspected infection	350	63	84	46	38	37	229	73	11	194	72
