# Supplementary figures and images for: Prognostic Accuracy of qSOFA and SIRS for Mortality in the Emergency Department: A Meta-Analysis and Systematic Review of Prospective Studies
Source: Hindawi journal article supplement (doi:10.1155/2022/1802707), 2022-05-05

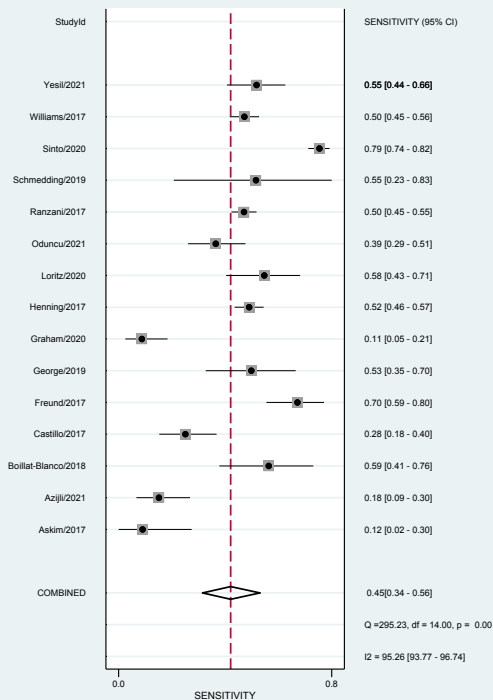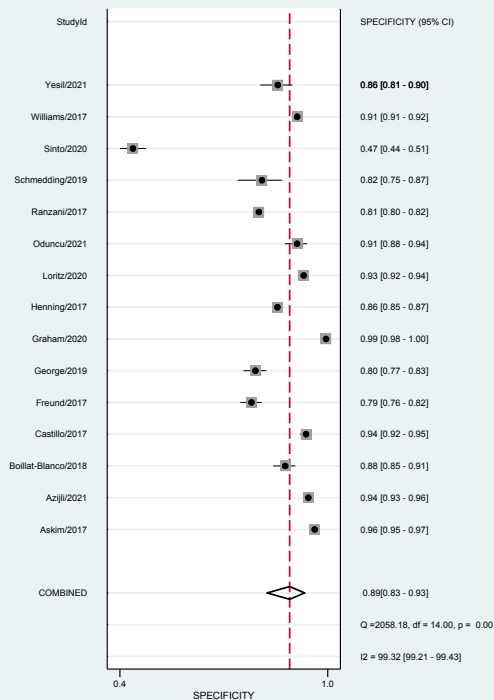

Supplement: f1 [file 1802707.f1.zip]

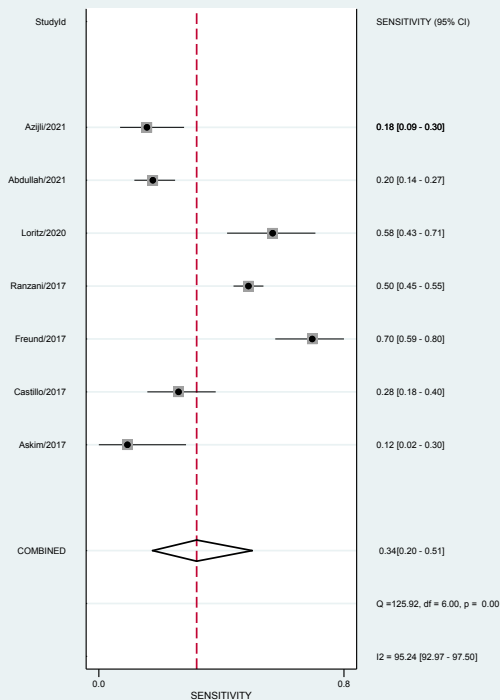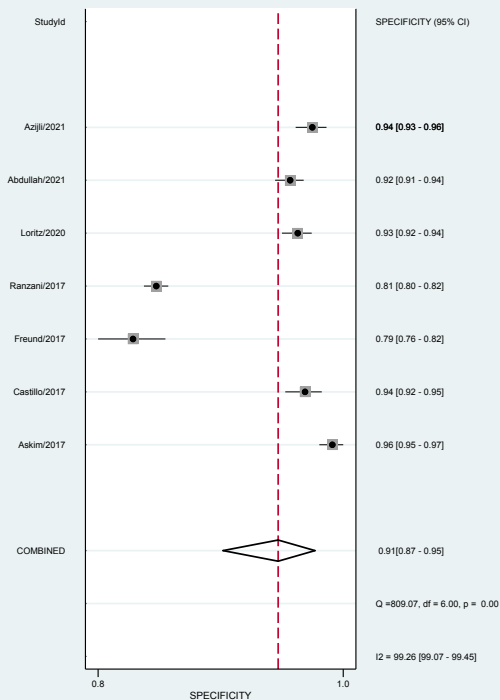

Supplement: f1 [file 1802707.f1.zip]

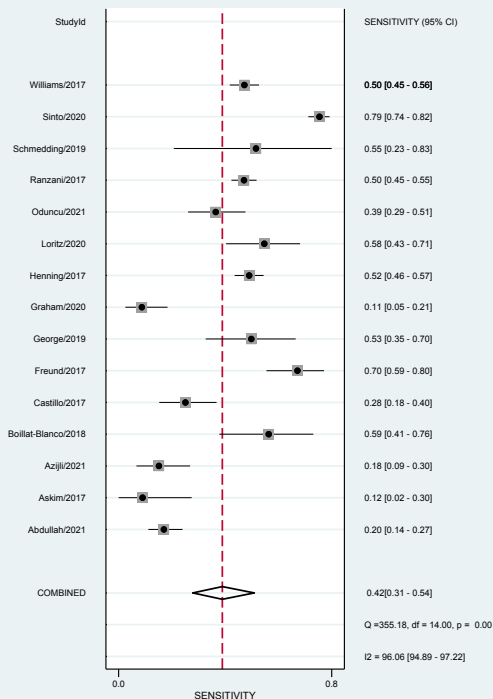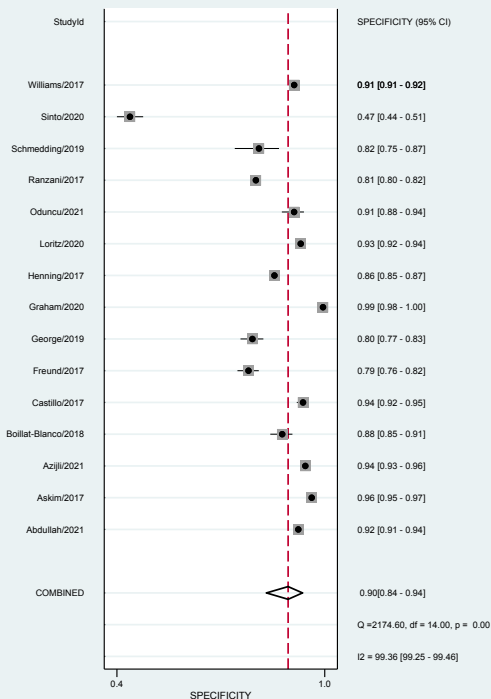

Supplement: f1 [file 1802707.f1.zip]

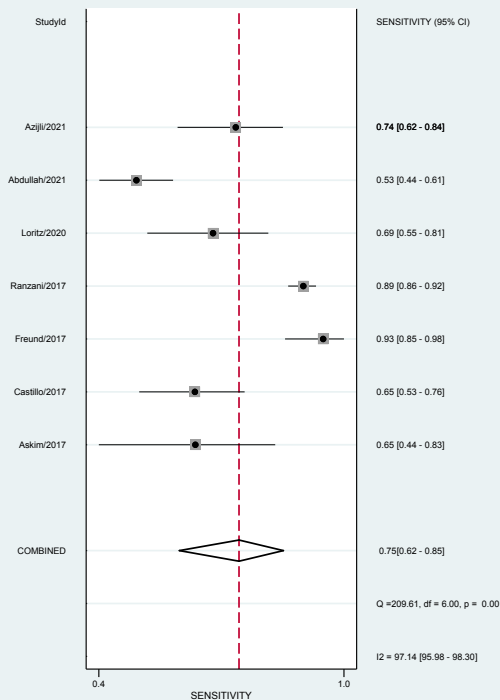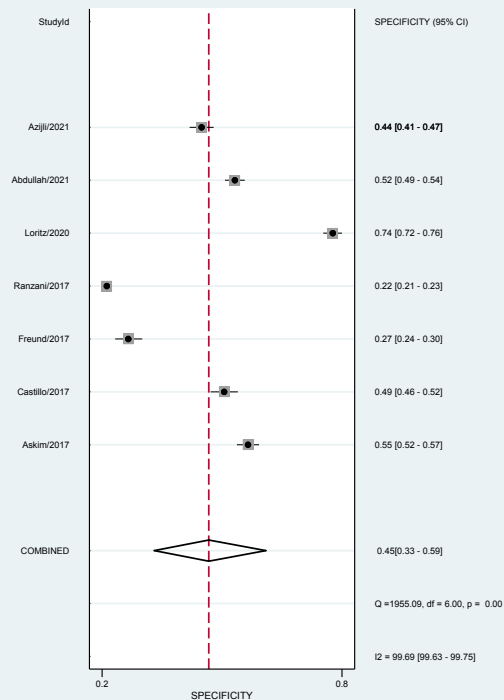

Supplement: f1 [file 1802707.f1.zip]

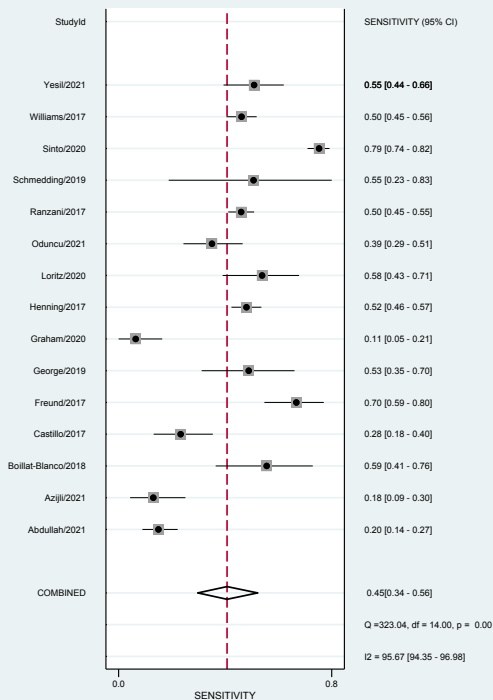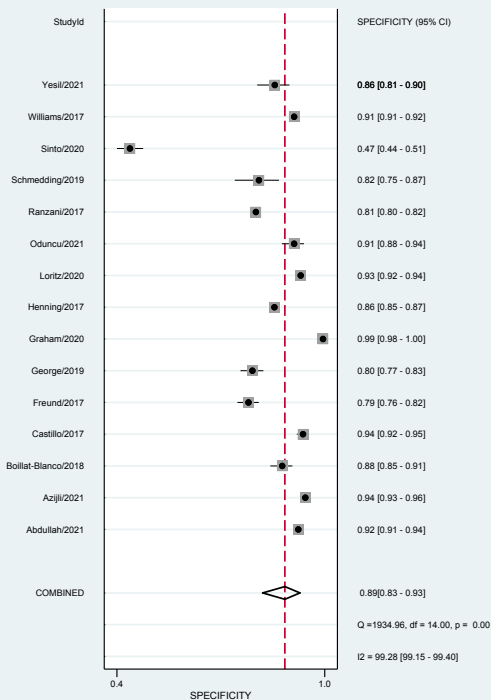

Supplement: f1 [file 1802707.f1.zip]

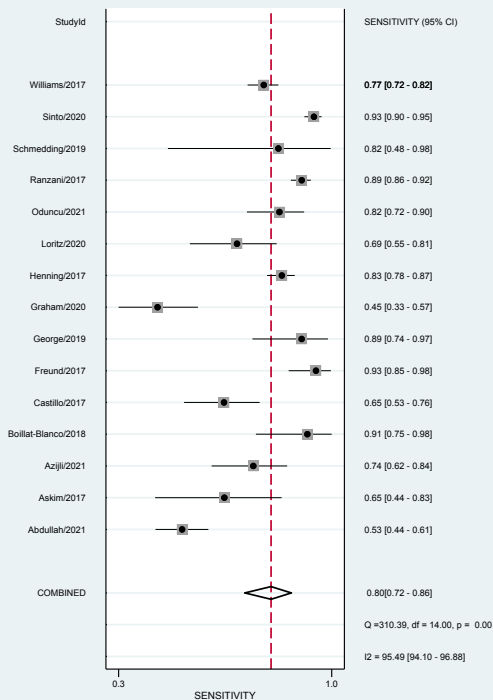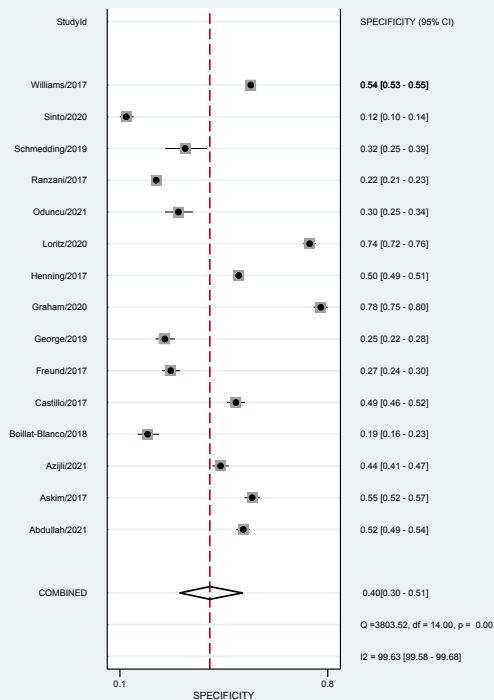

Supplement: f1 [file 1802707.f1.zip]

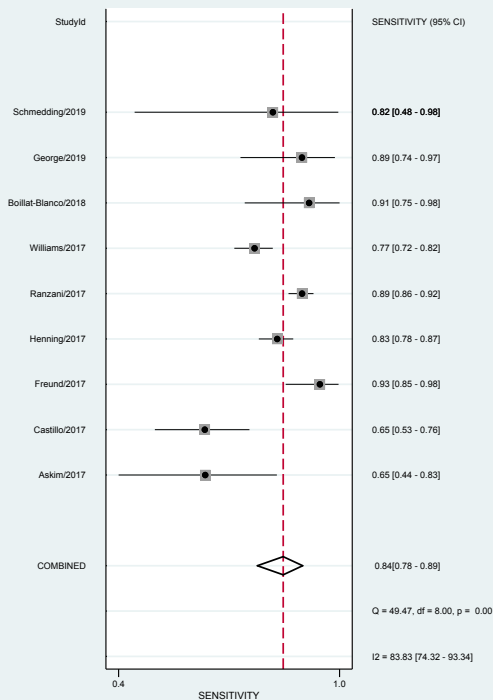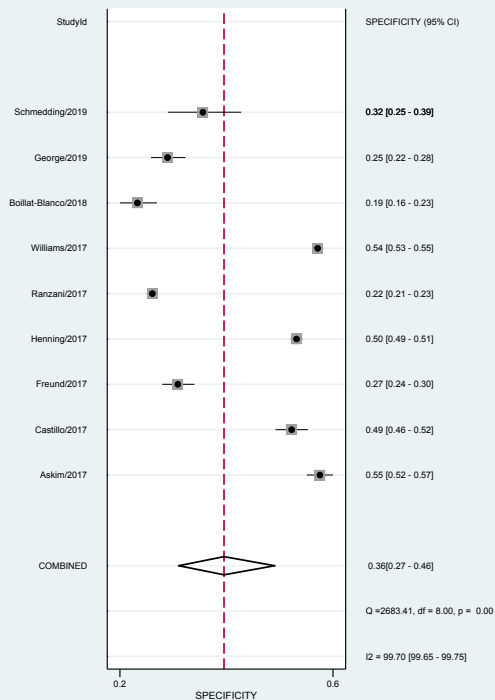

Supplement: f1 [file 1802707.f1.zip]

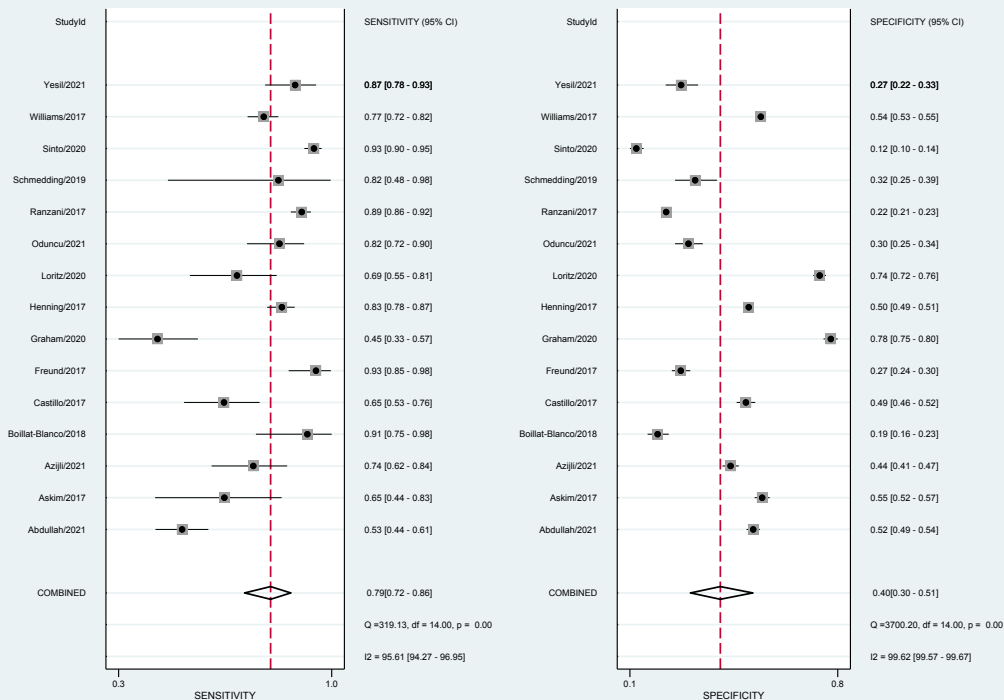

Supplement: f1 [file 1802707.f1.zip]

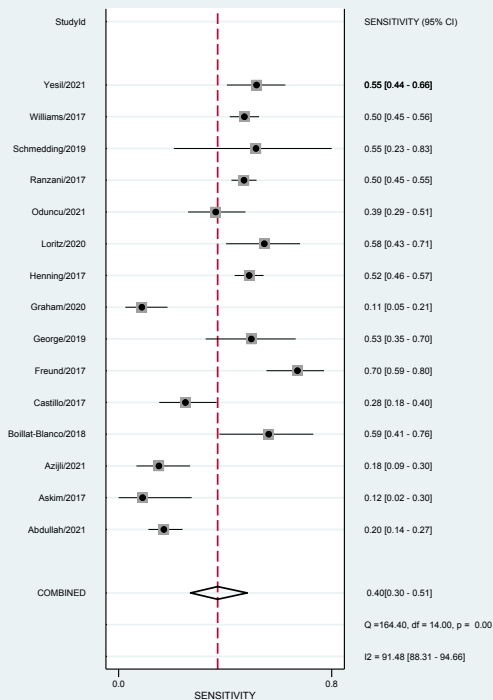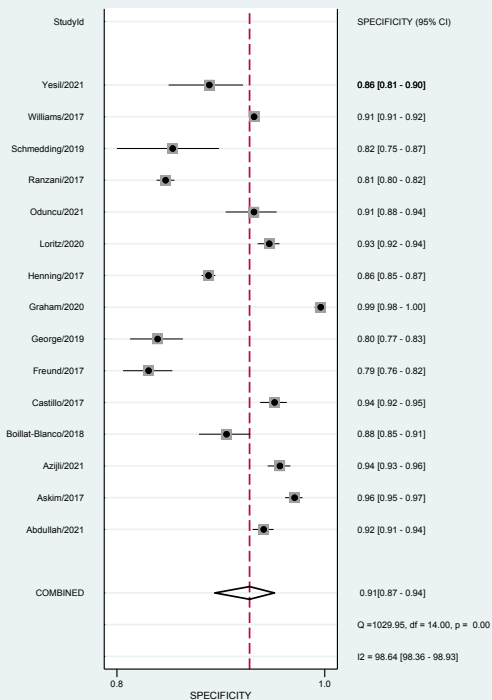

Supplement: f1 [file 1802707.f1.zip]

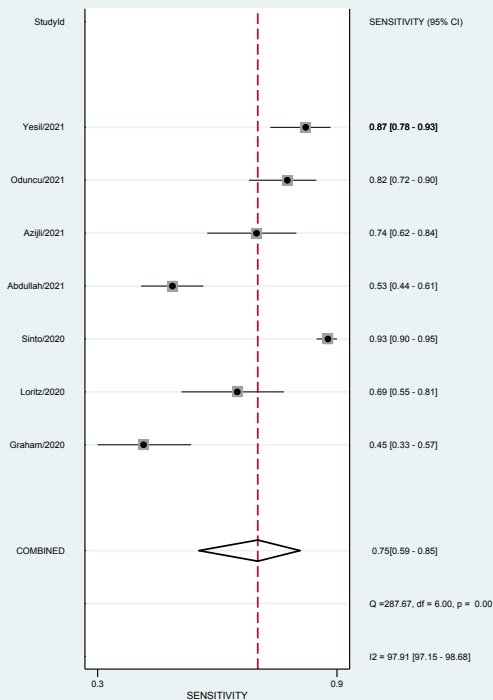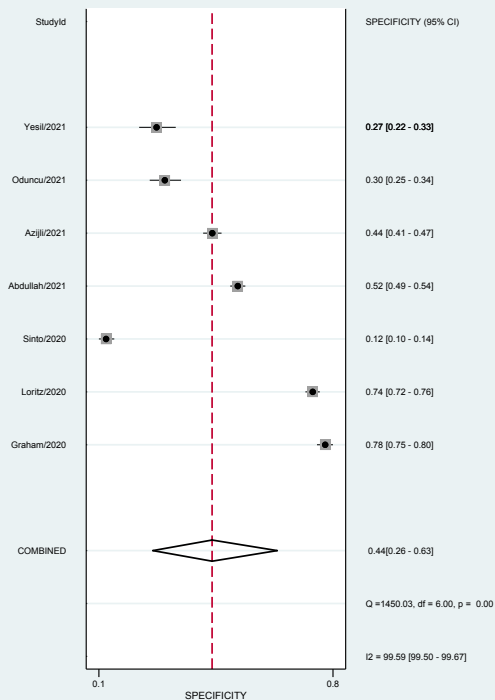

Supplement: f1 [file 1802707.f1.zip]

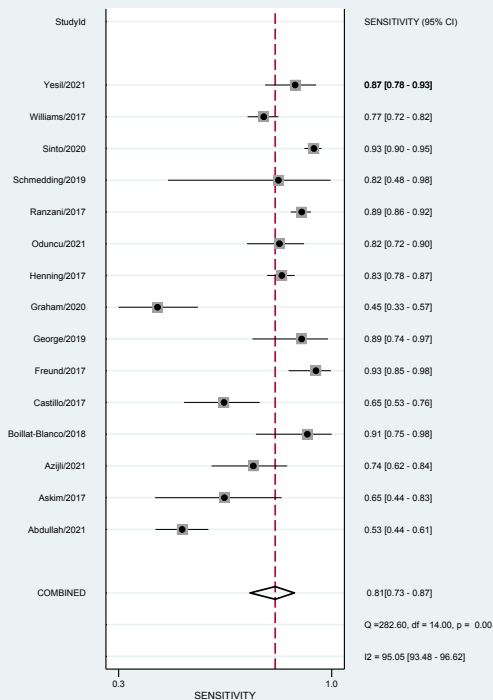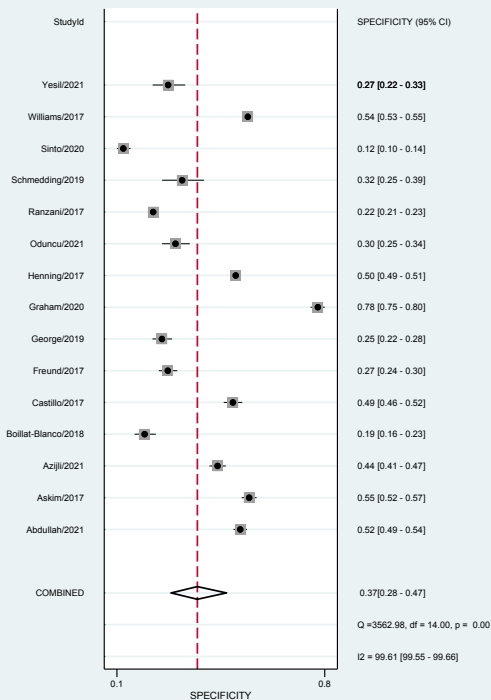

Supplement: f1 [file 1802707.f1.zip]

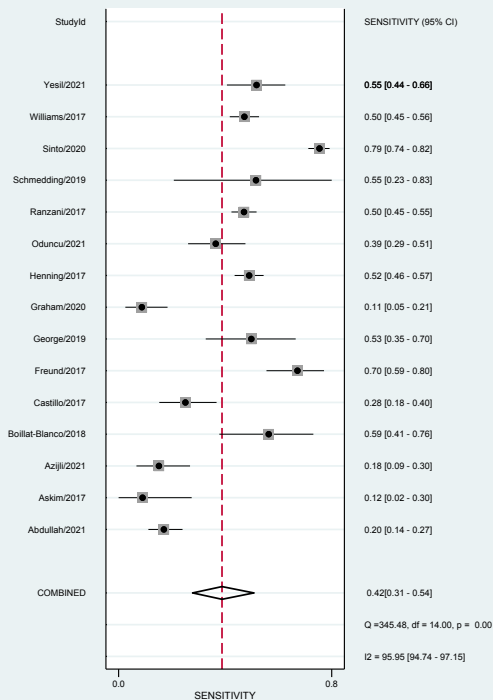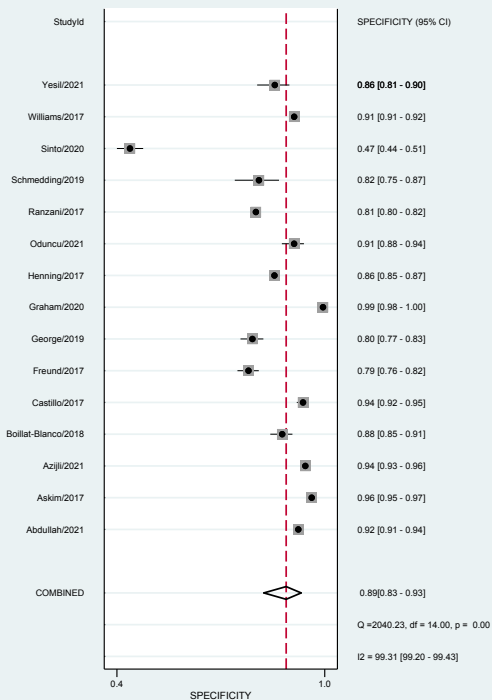

Supplement: f1 [file 1802707.f1.zip]

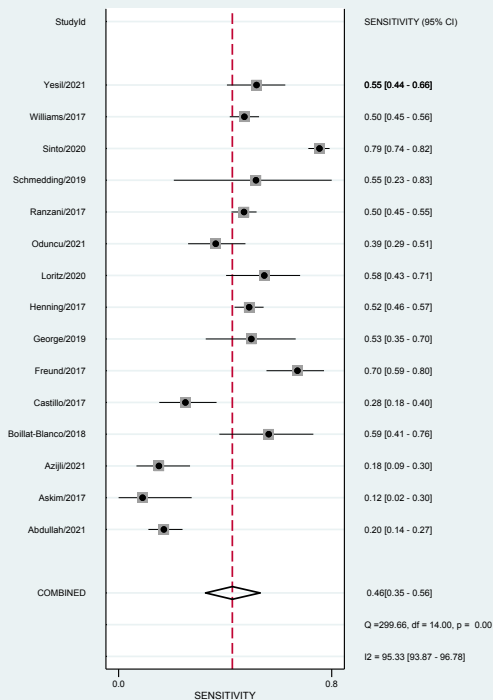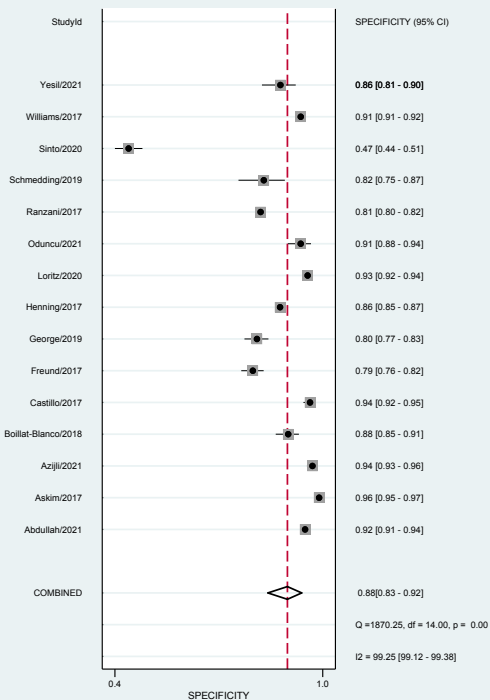

Supplement: f1 [file 1802707.f1.zip]

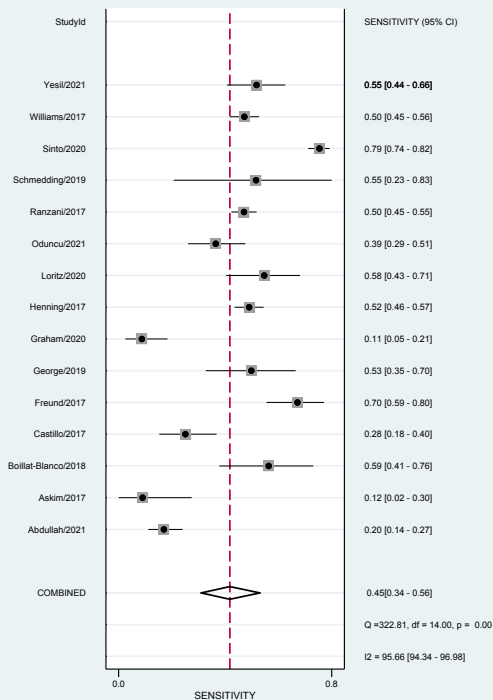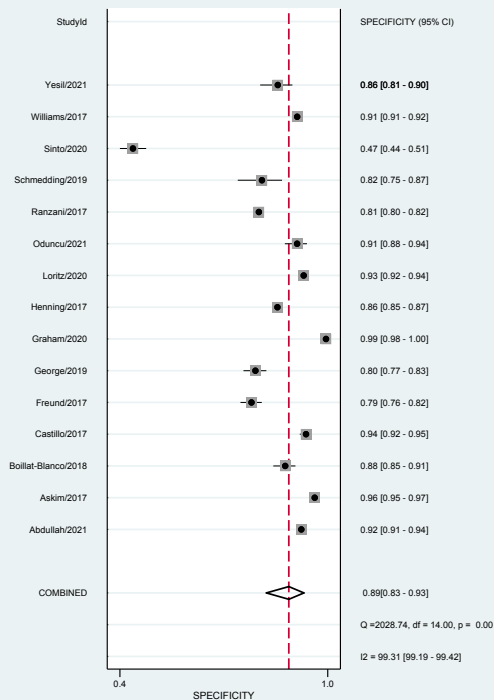

Supplement: f1 [file 1802707.f1.zip]

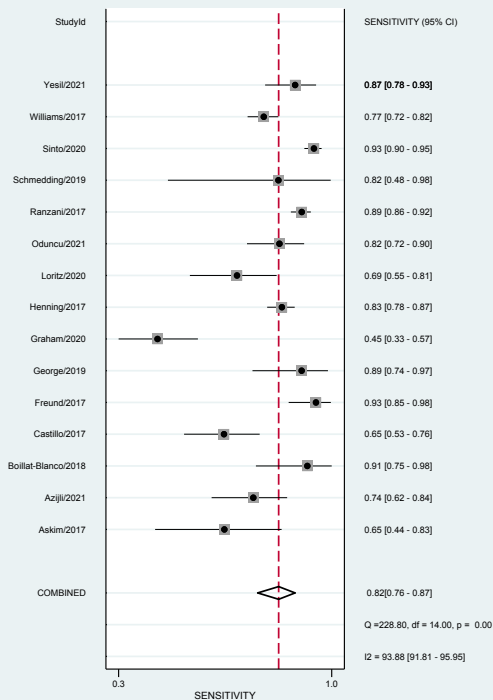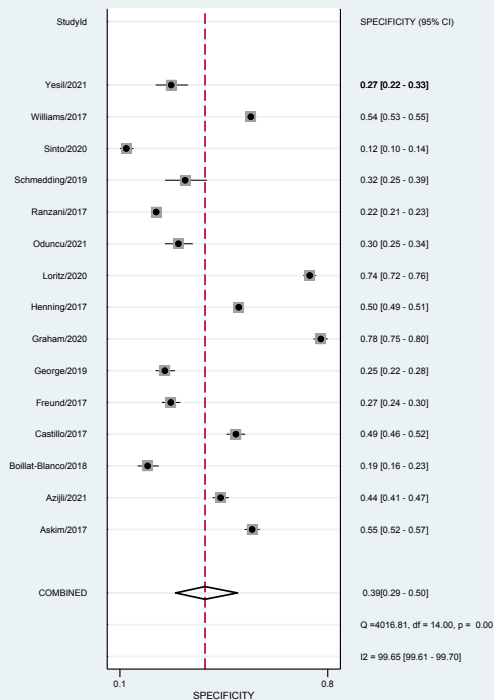

Supplement: f1 [file 1802707.f1.zip]

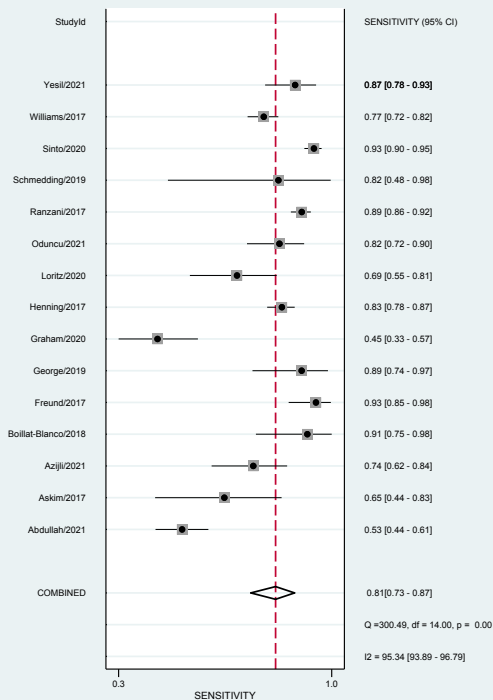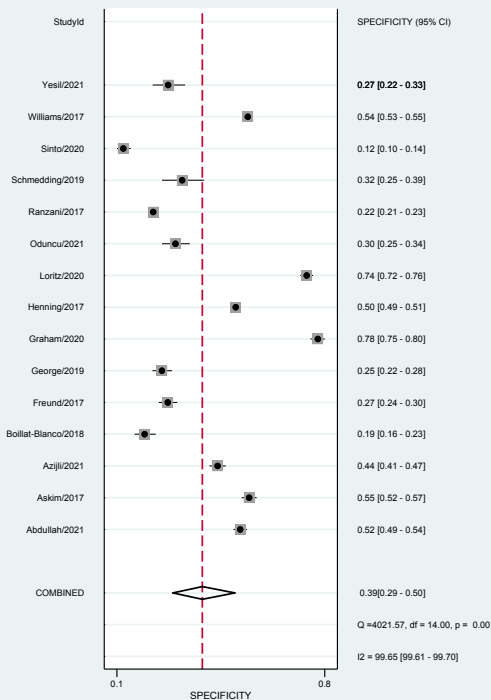

Supplement: f1 [file 1802707.f1.zip]

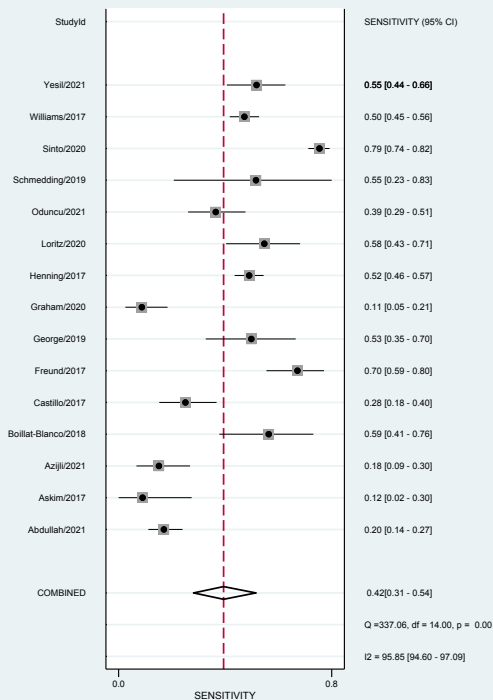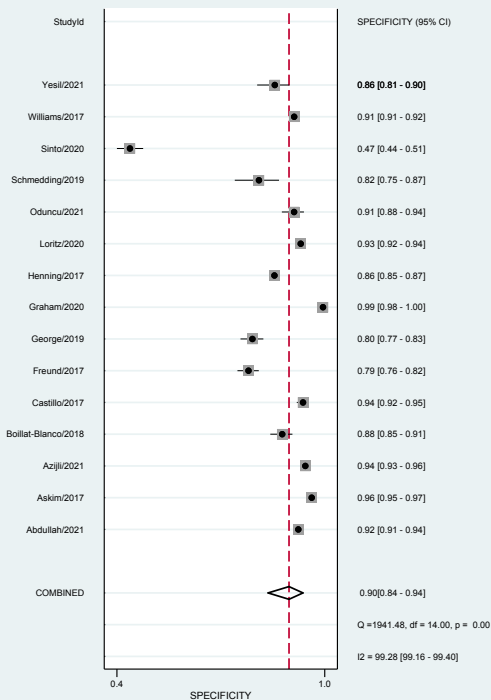

Supplement: f1 [file 1802707.f1.zip]

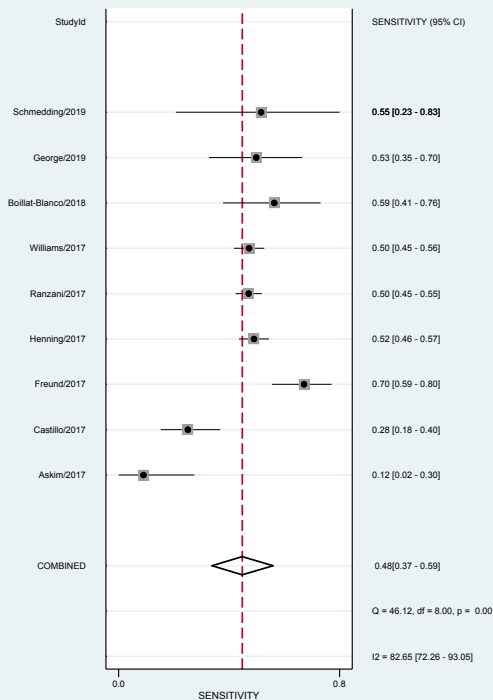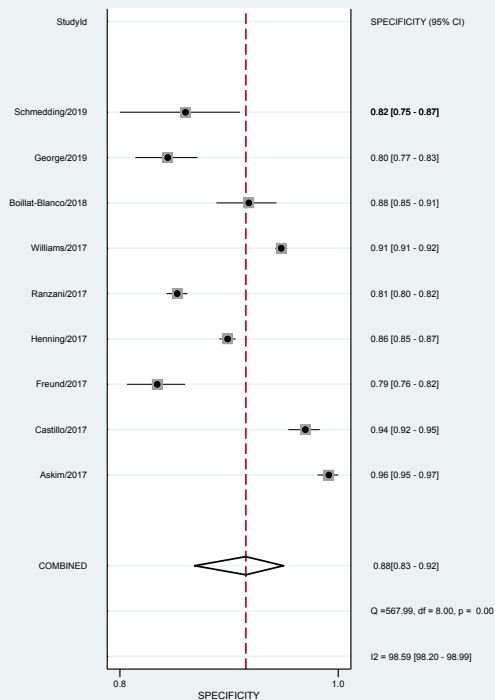

Supplement: f1 [file 1802707.f1.zip]

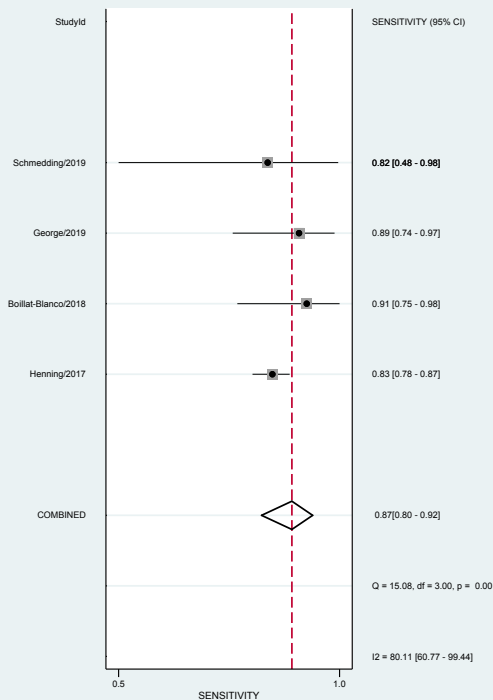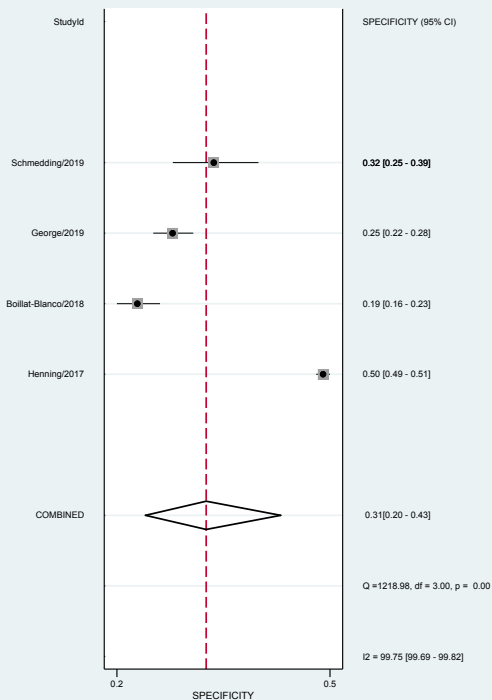

Supplement: f1 [file 1802707.f1.zip]

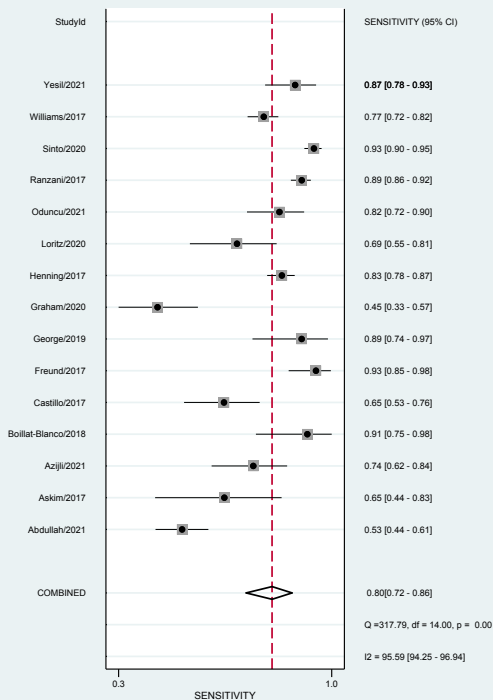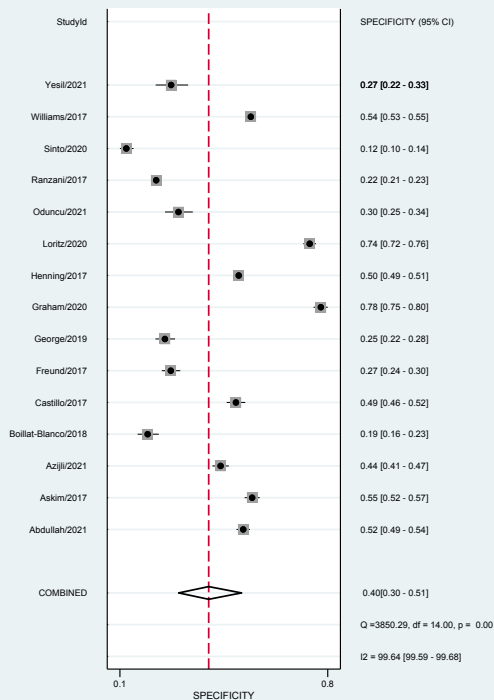

Supplement: f1 [file 1802707.f1.zip]

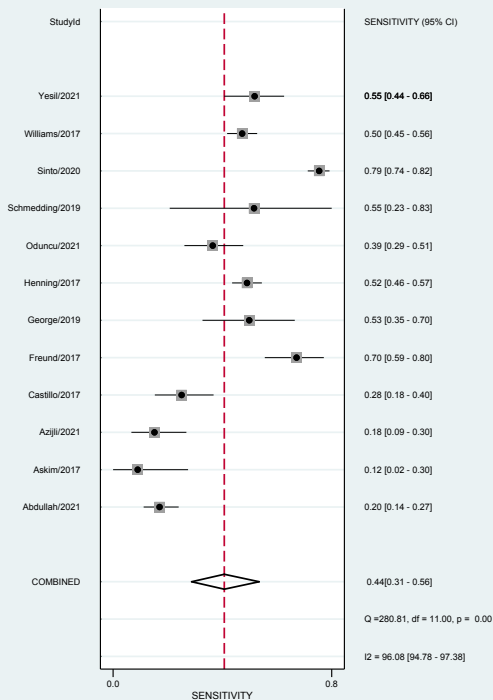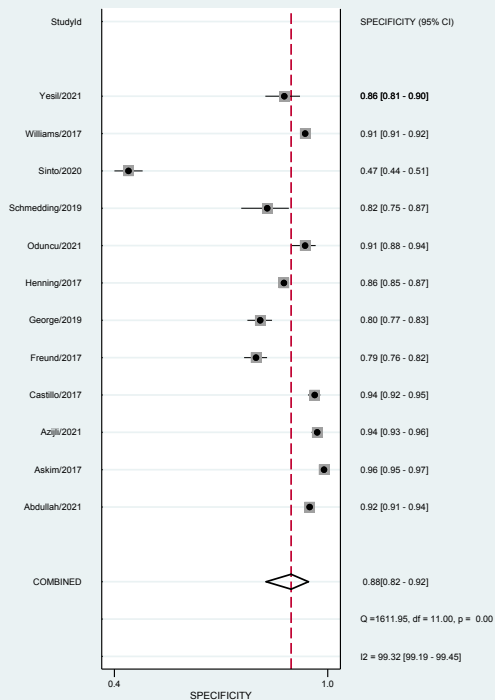

Supplement: f1 [file 1802707.f1.zip]

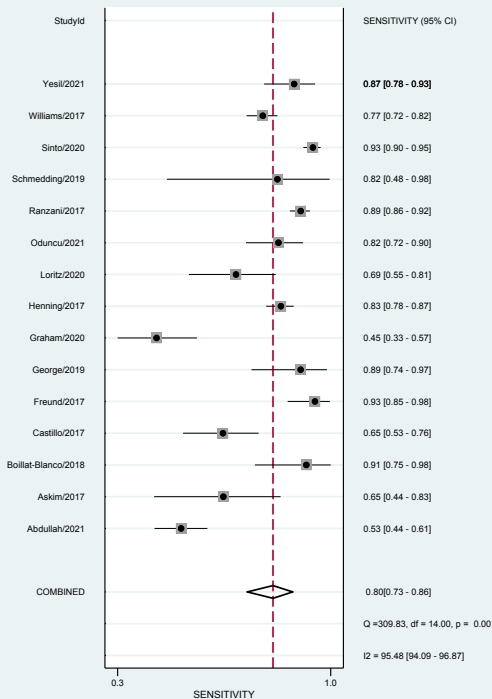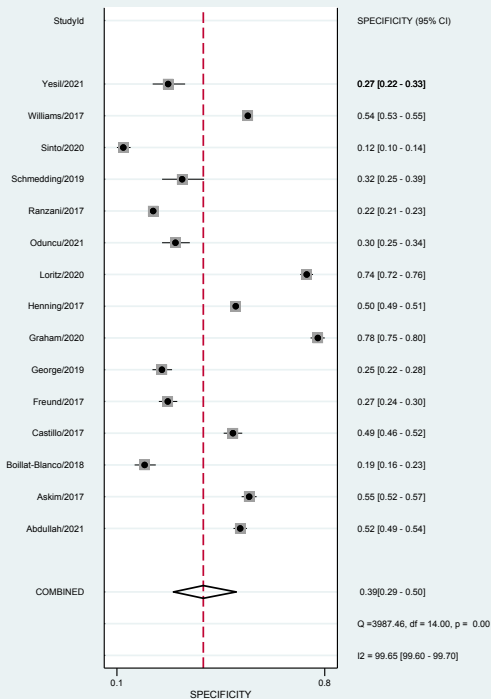

Supplement: f1 [file 1802707.f1.zip]

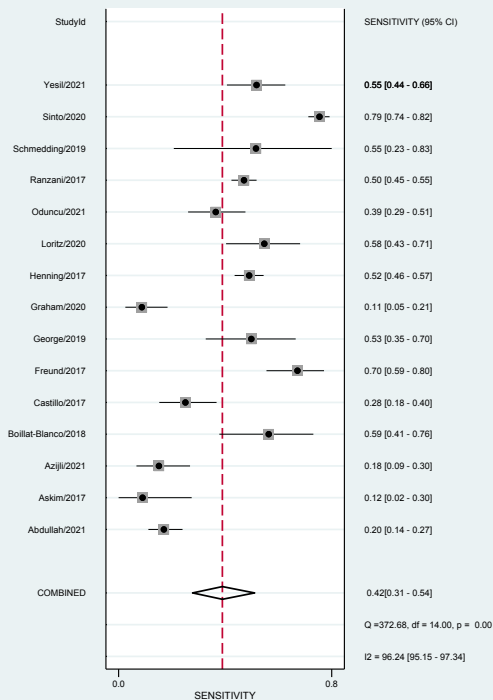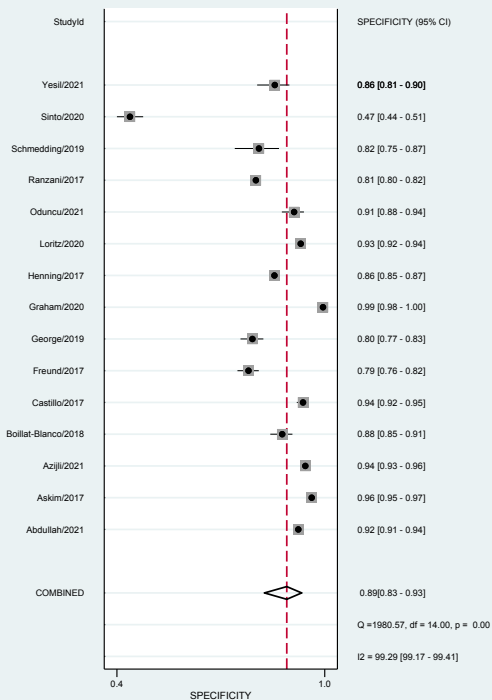

Supplement: f1 [file 1802707.f1.zip]

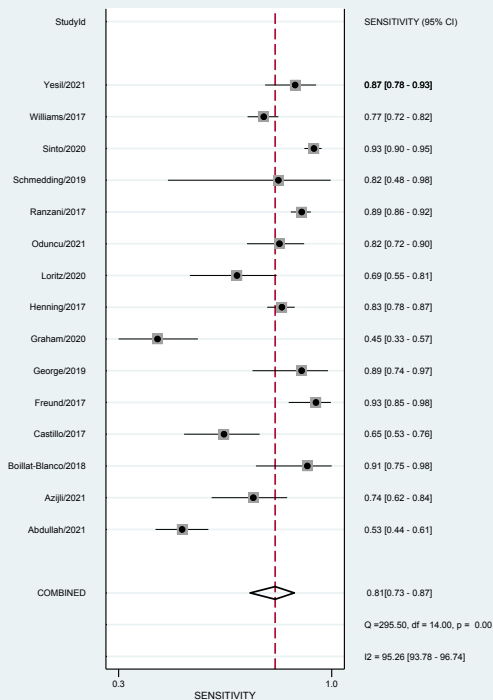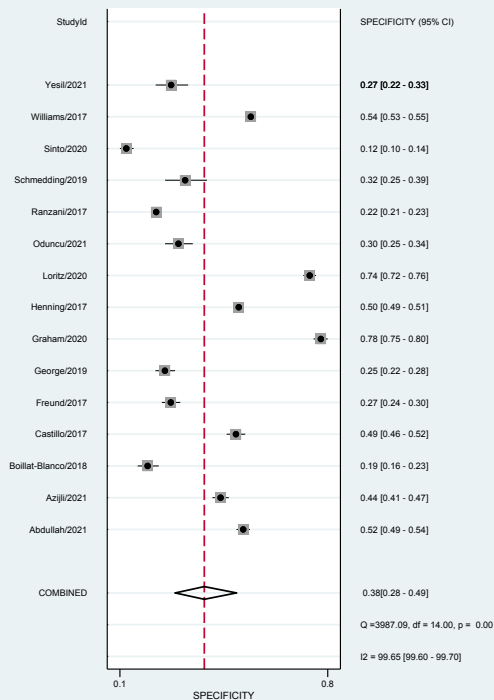

Supplement: f1 [file 1802707.f1.zip]

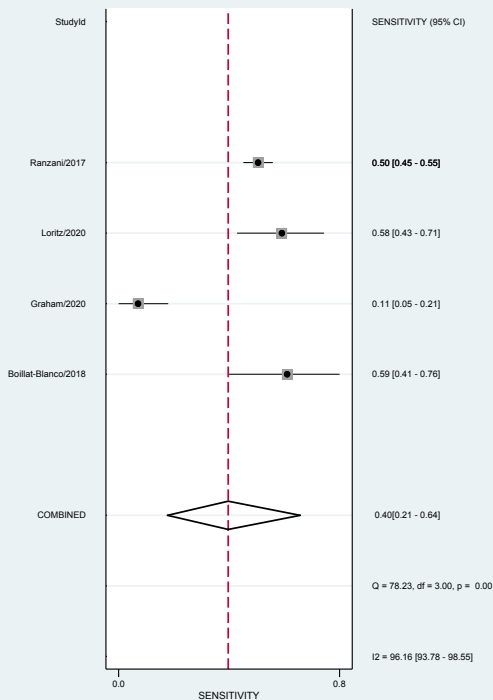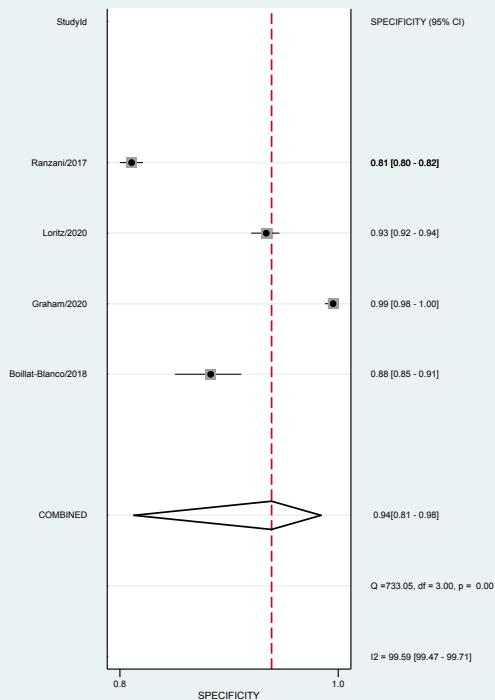

Supplement: f1 [file 1802707.f1.zip]

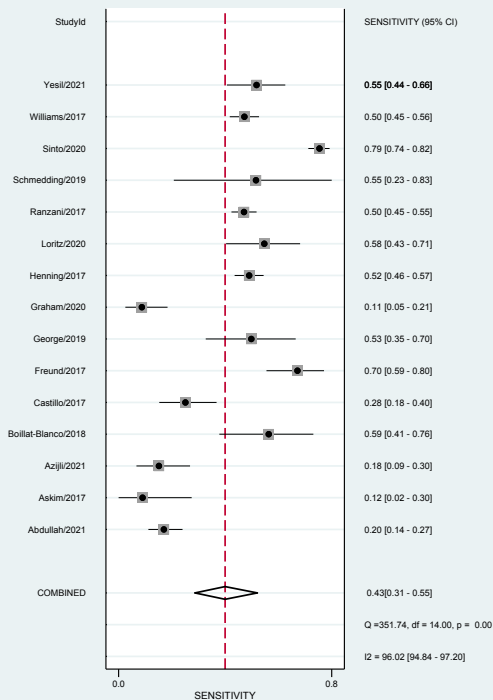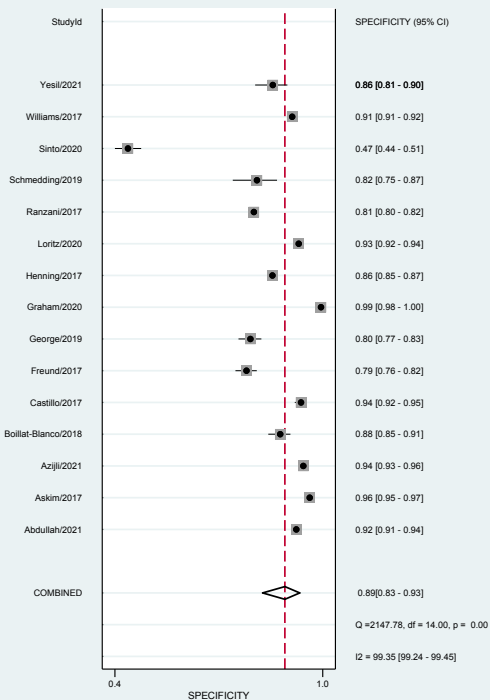

Supplement: f1 [file 1802707.f1.zip]

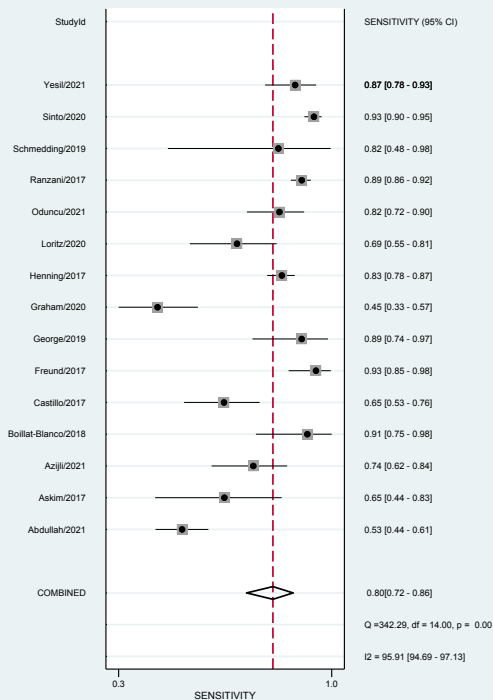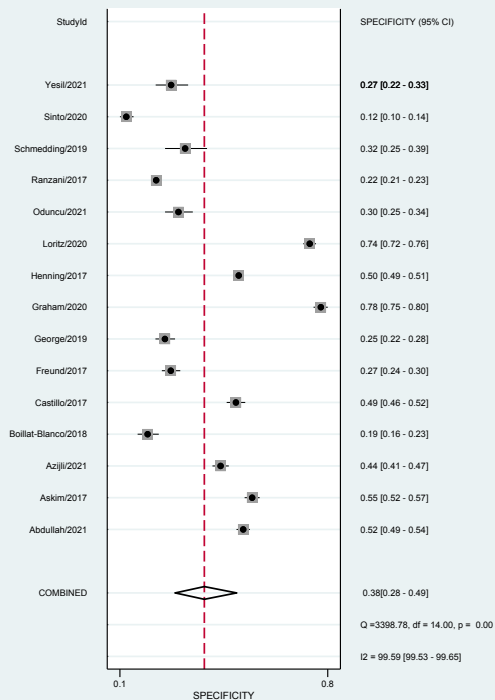

Supplement: f1 [file 1802707.f1.zip]

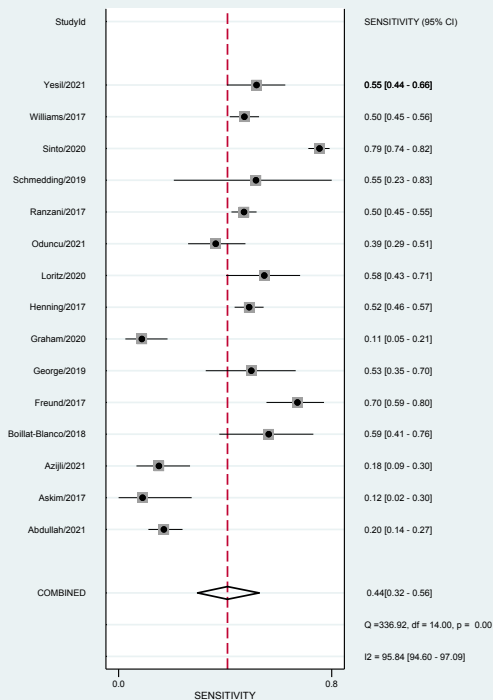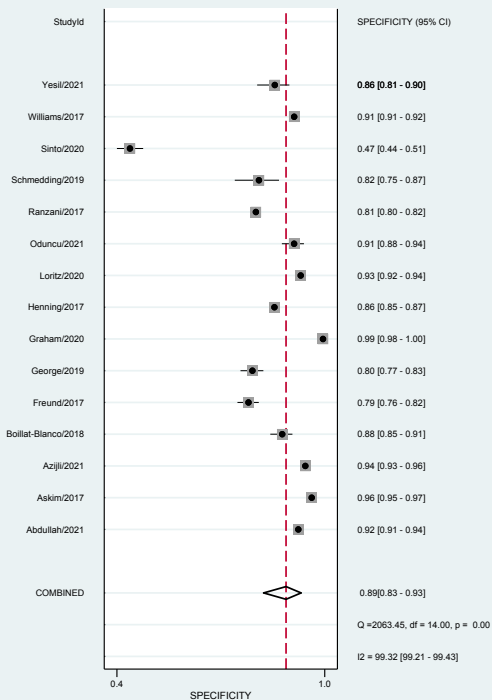

Supplement: f1 [file 1802707.f1.zip]

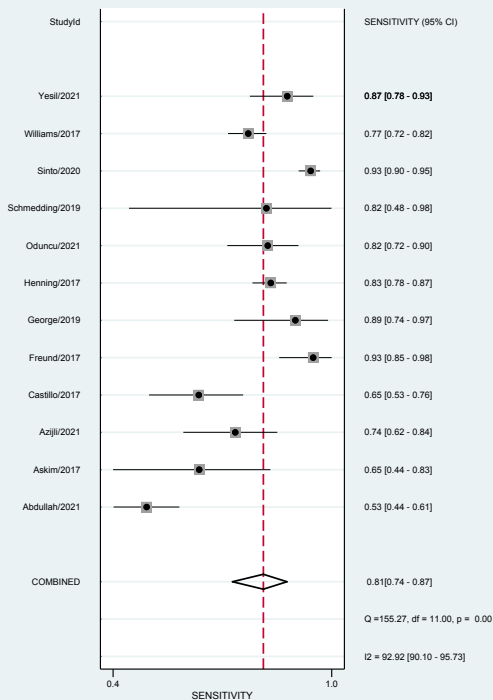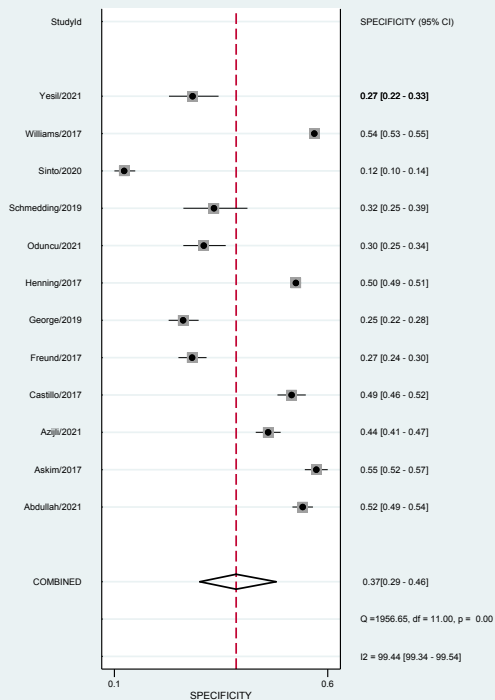

Supplement: f1 [file 1802707.f1.zip]

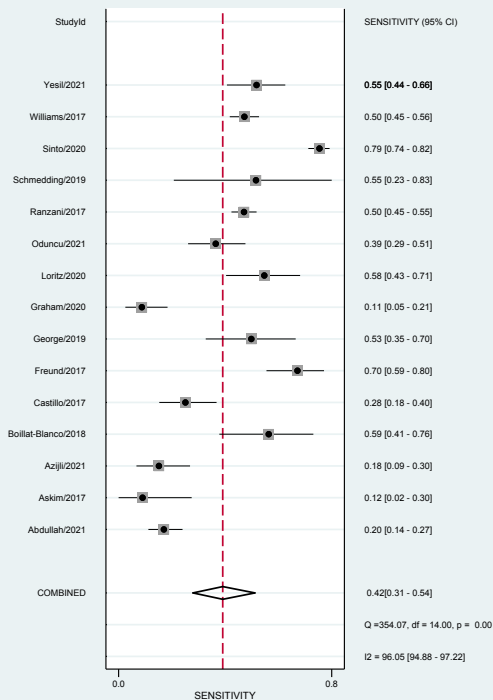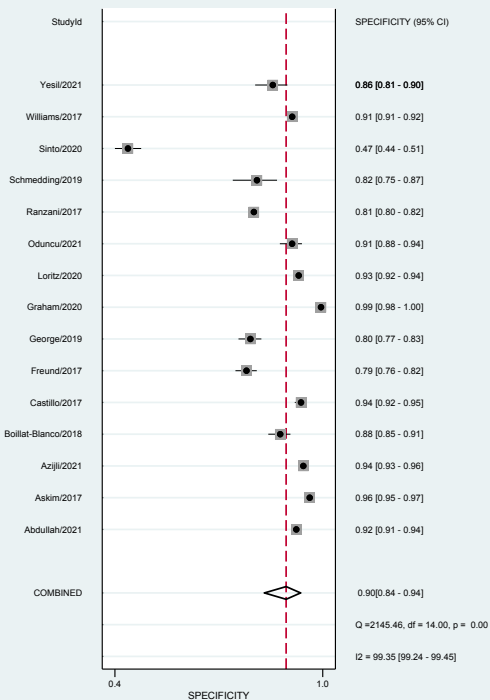

Supplement: f1 [file 1802707.f1.zip]

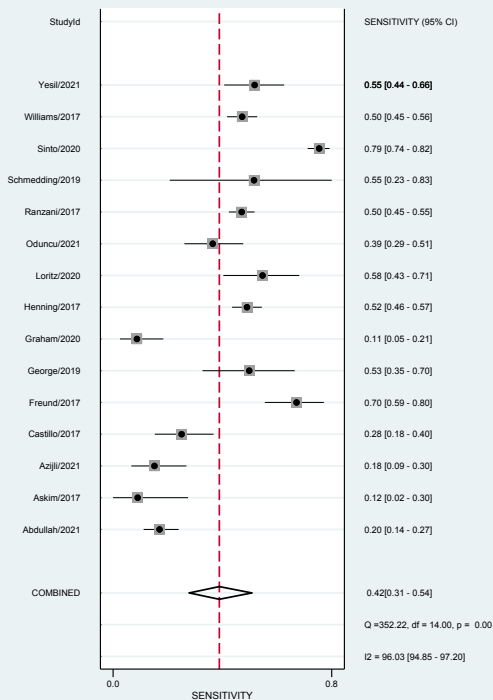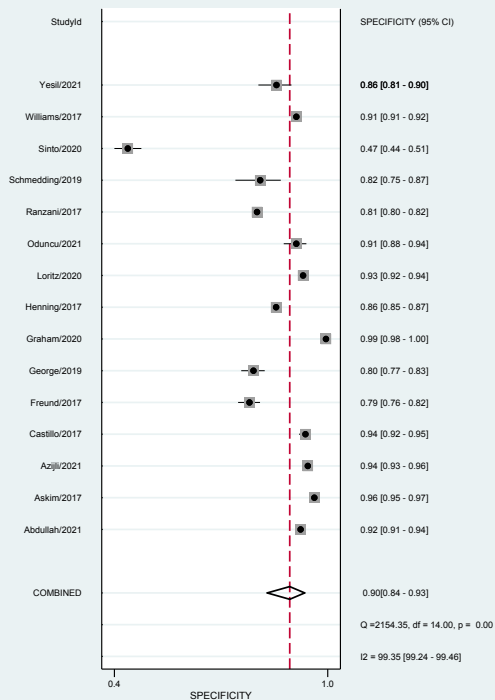

Supplement: f1 [file 1802707.f1.zip]

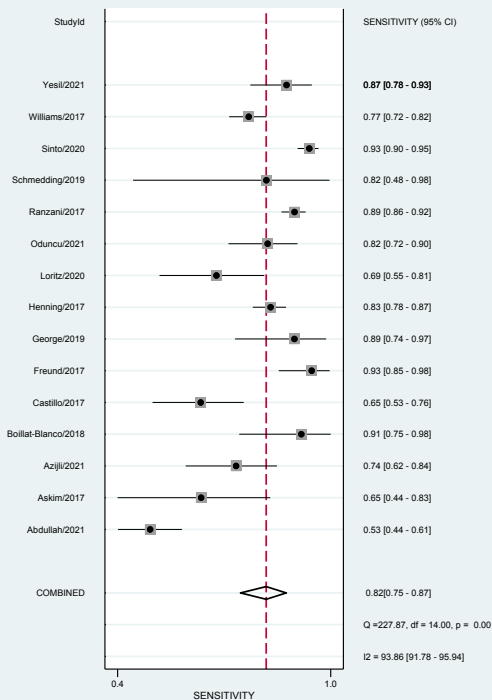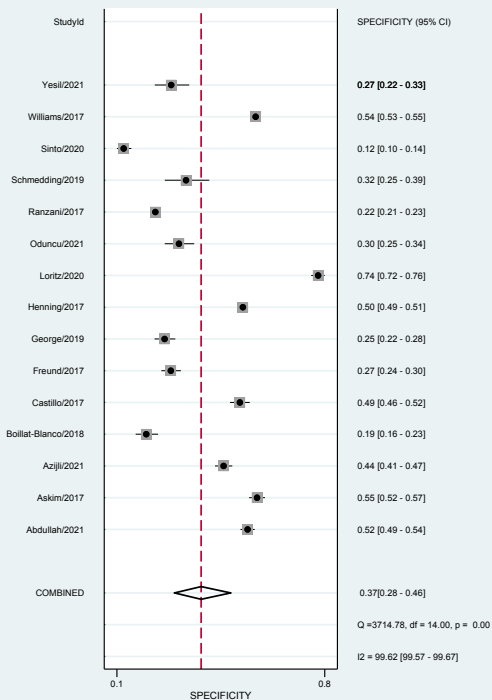

Supplement: f1 [file 1802707.f1.zip]

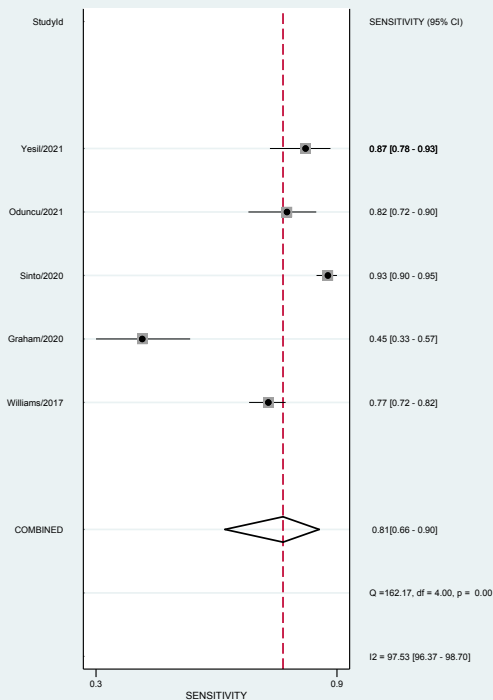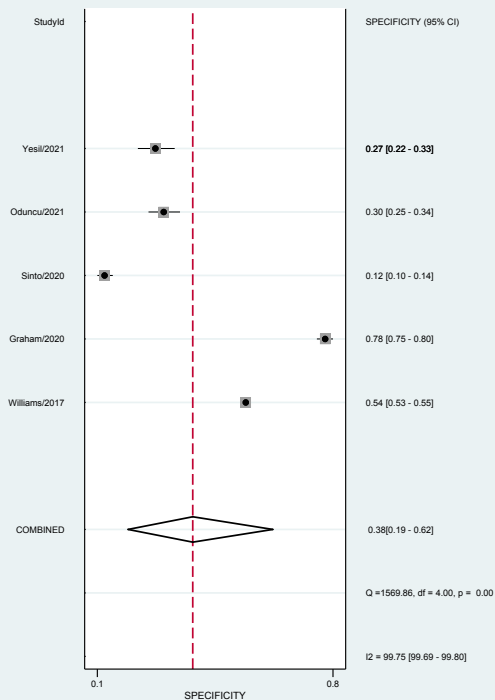

Supplement: f1 [file 1802707.f1.zip]

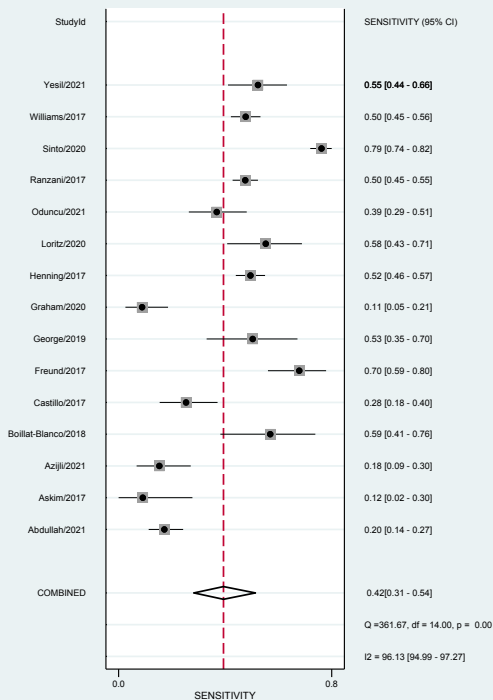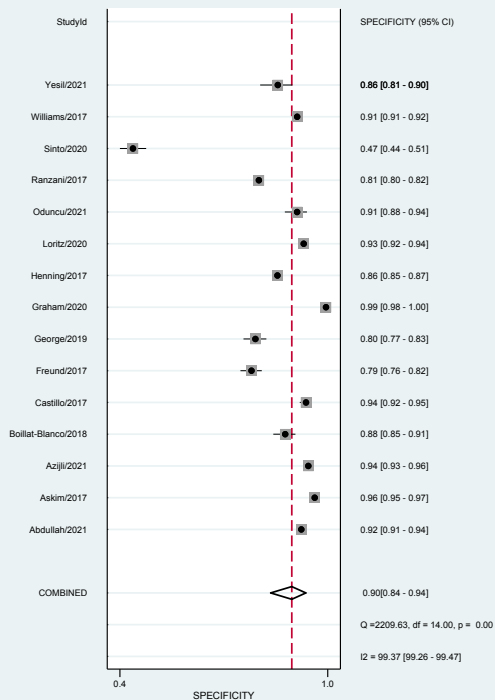

Supplement: f1 [file 1802707.f1.zip]

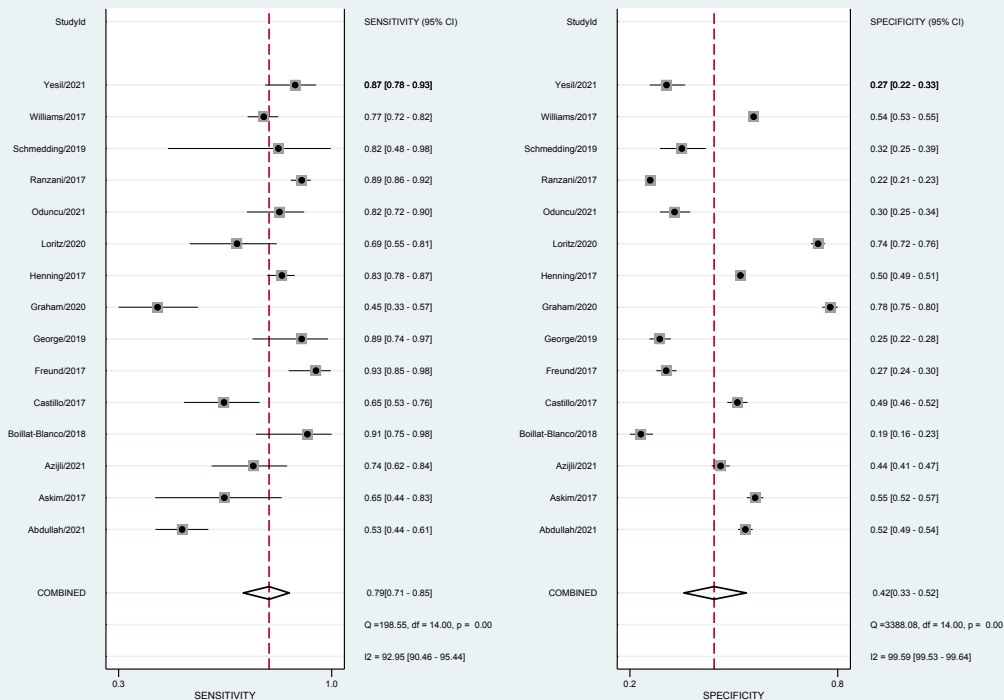

Supplement: f1 [file 1802707.f1.zip]

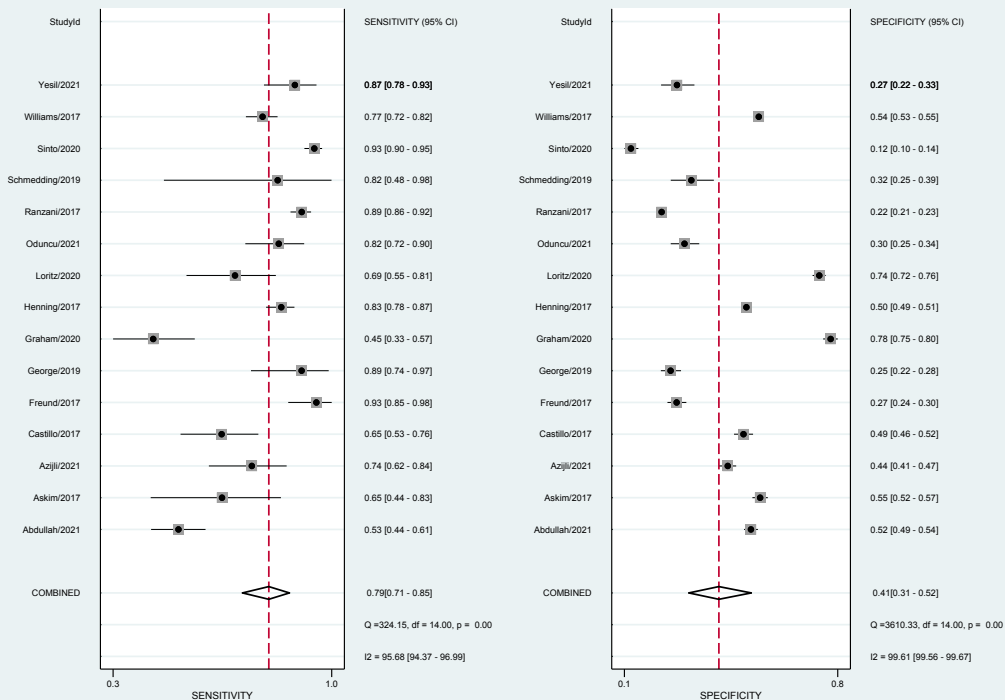

Supplement: f1 [file 1802707.f1.zip]

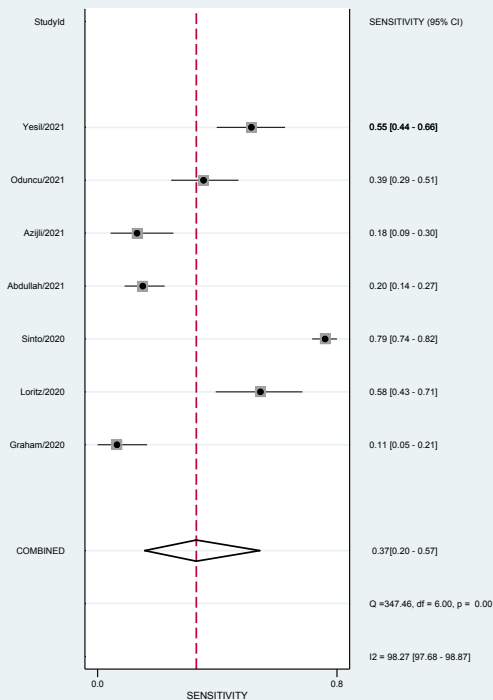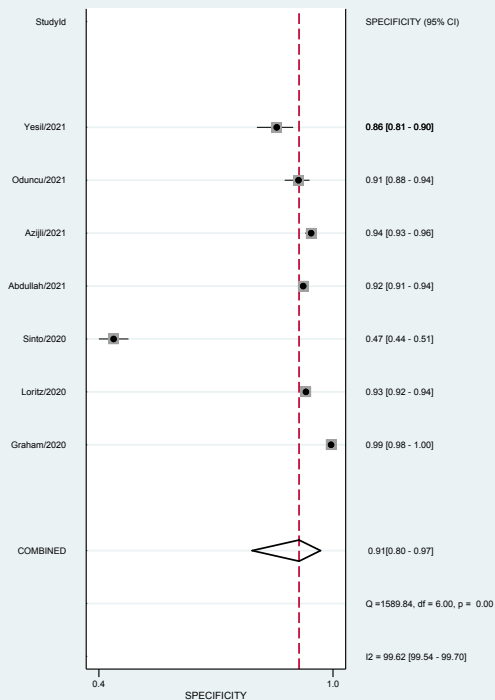

Supplement: f1 [file 1802707.f1.zip]

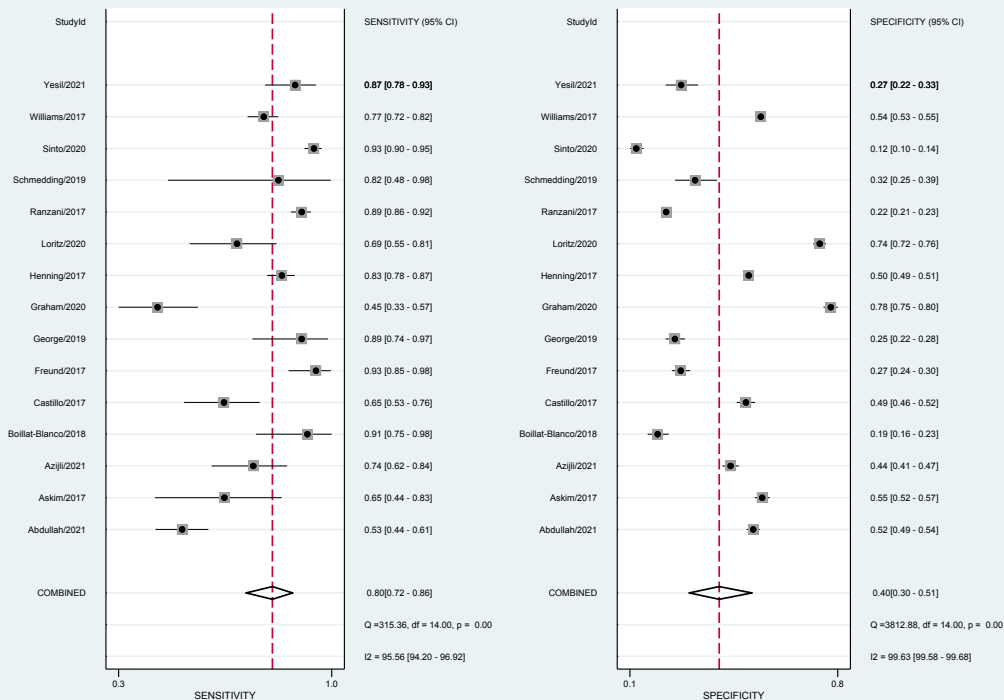

Supplement: f1 [file 1802707.f1.zip]

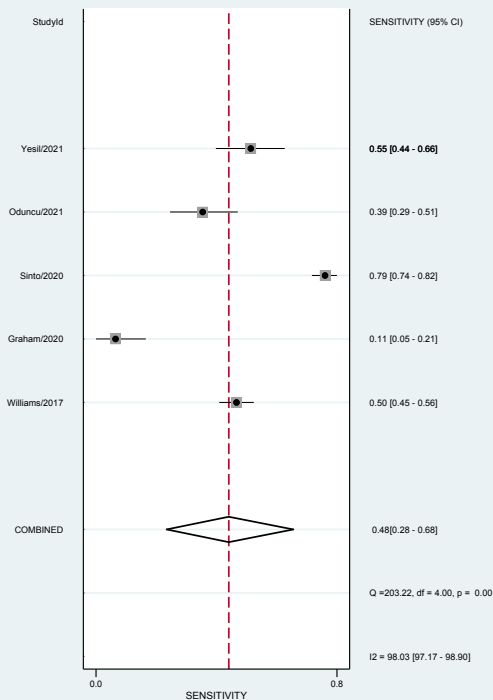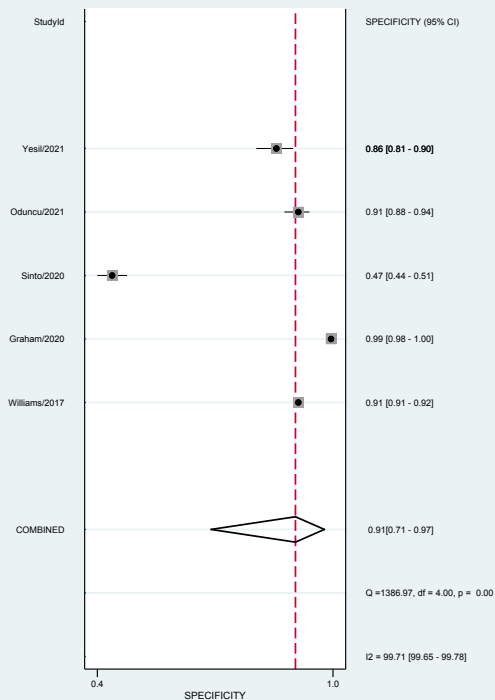

Supplement: f1 [file 1802707.f1.zip]

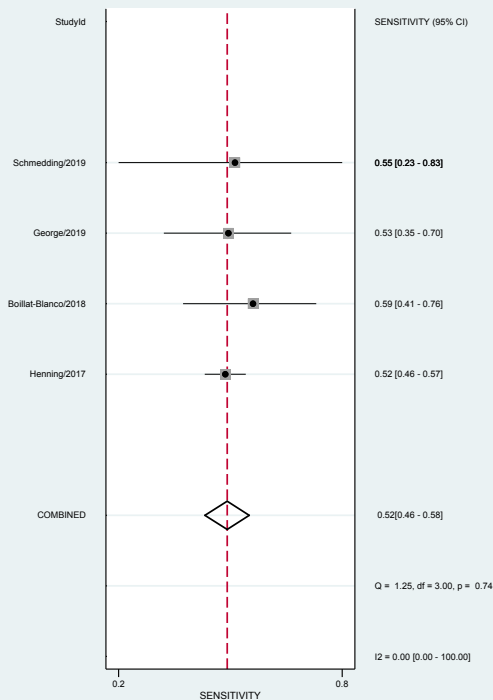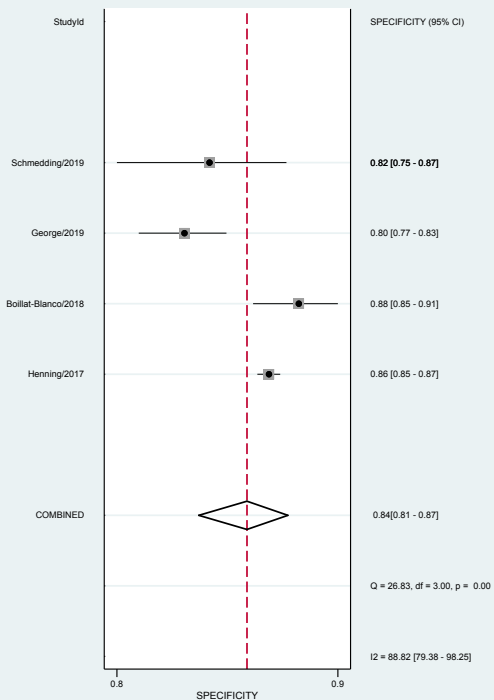

Supplement: f1 [file 1802707.f1.zip]

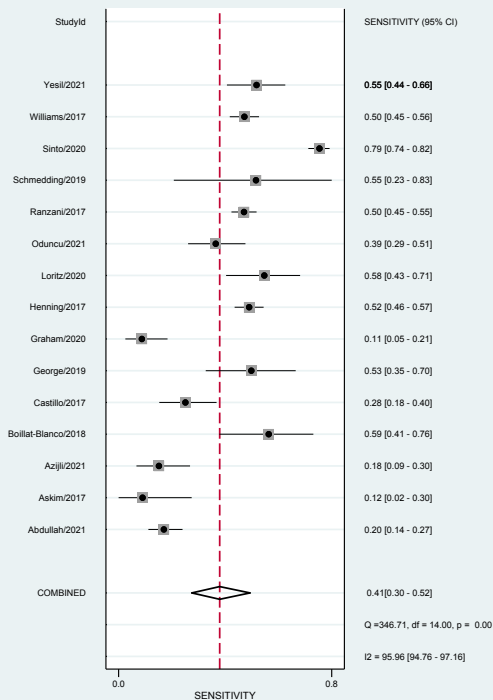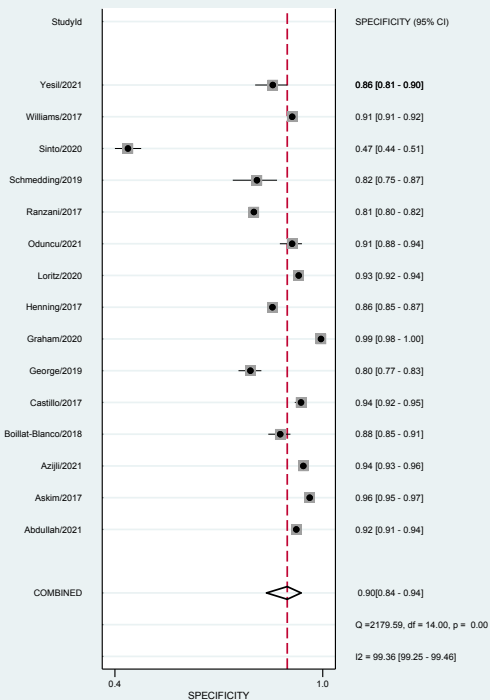

Supplement: f1 [file 1802707.f1.zip]

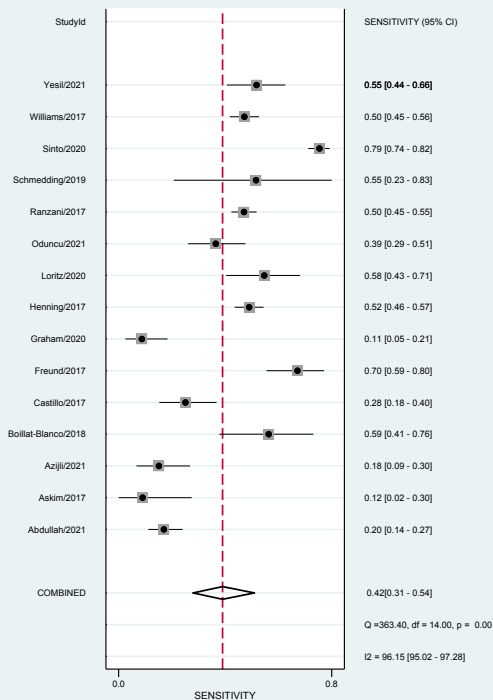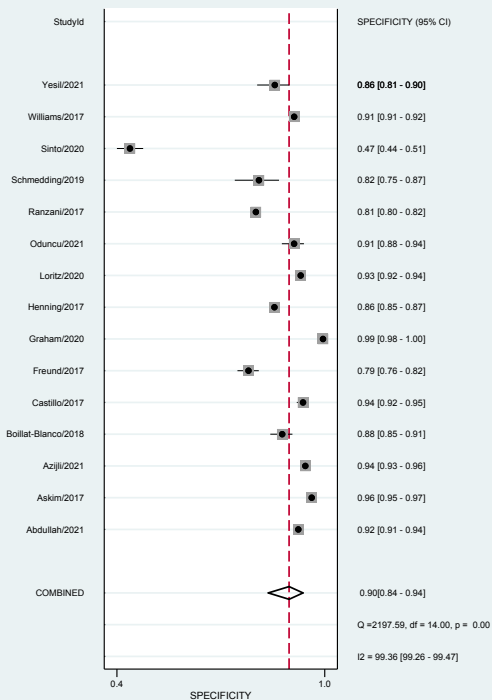

Supplement: f1 [file 1802707.f1.zip]

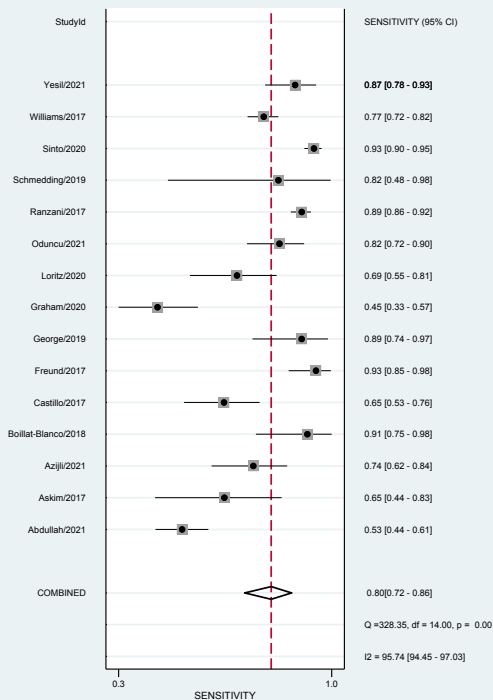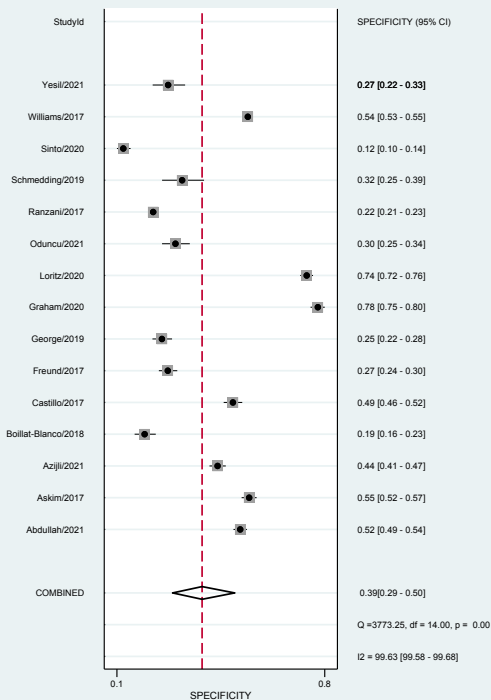

Supplement: f1 [file 1802707.f1.zip]

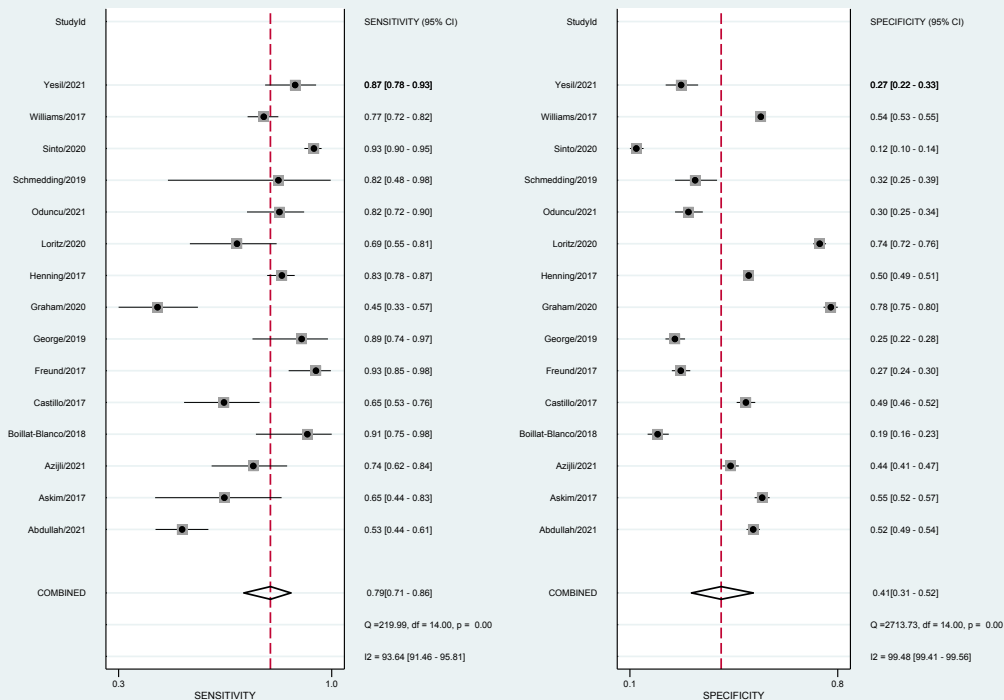

Supplement: f1 [file 1802707.f1.zip]

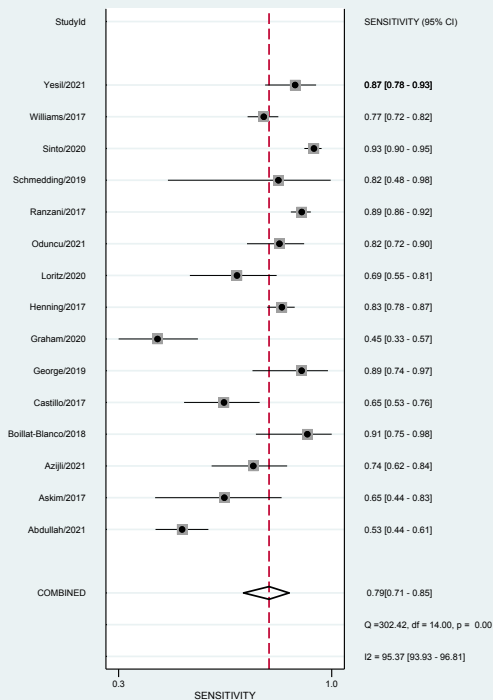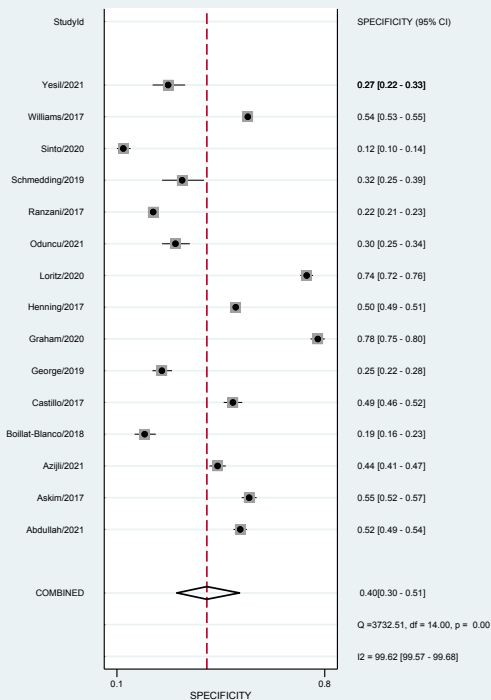

Supplement: f1 [file 1802707.f1.zip]
